# Supplementary material for: Percolation Network Formation in Nylon 6/Montmorillonite Nanocomposites: A Critical Structural Insight and the Impact on Solidification Process and Mechanical Behavior
Source: MDPI journal article supplement (doi:10.3390/polym14173672), 2022-09-04
Supplement: s1 [file s1]

# Percolation network formation in Nylon 6/ montmorillonite nanocomposites: a critical structural insight and the impact on solidification process and mechanical behavior

<sup>a</sup> College of Material, Chemistry and Chemical Engineering, Key Laboratory of Organosilicon Chemistry and Material Technology, Ministry of Education, Hangzhou Normal University, Hangzhou, 311121, People's Republic of China

<sup>b</sup> Jiangsu Boiln Plastics Company Limited, Zhangjiagang 215626, People's Republic of China

\* Corresponding authors. E-mail address: yongjin-li@hznu.edu.cn (Yongjin Li), tzyan@hznu.edu.cn (Tingzi Yan).

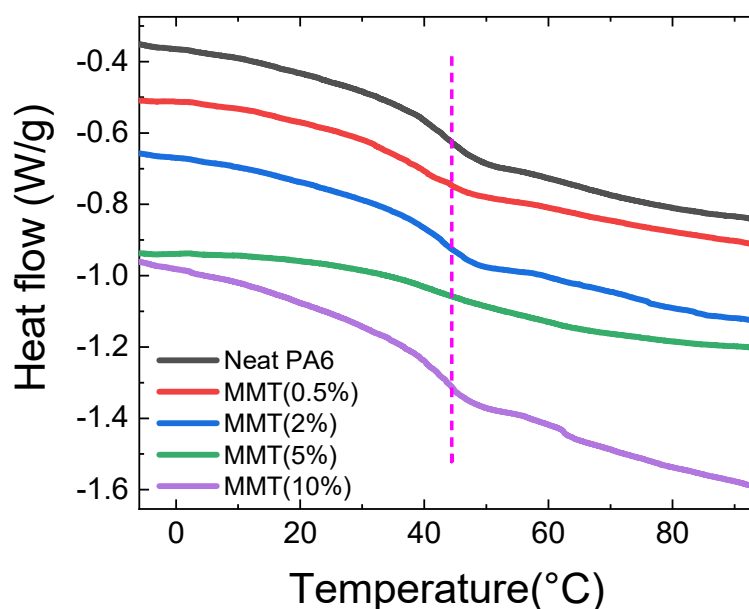

Figure S1. Glass transition of PA6 nanocomposites from DSC results.

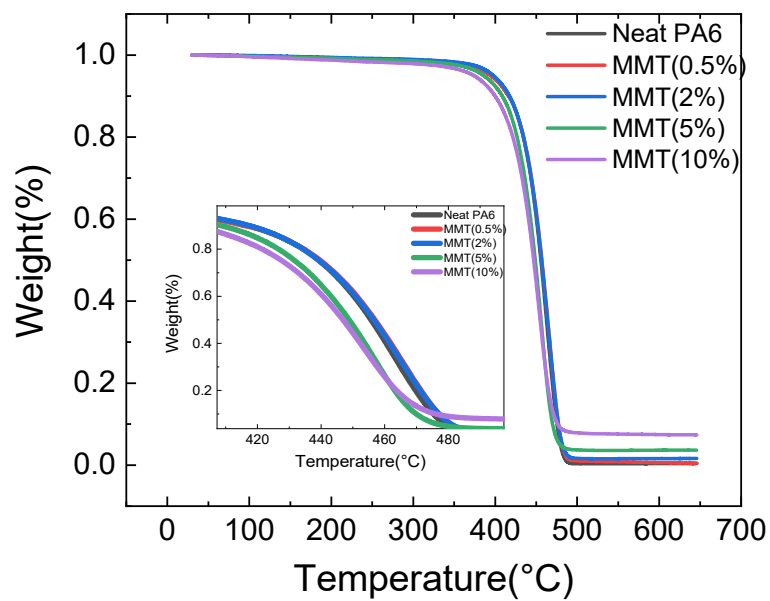

Figure S2: TGA results of neat PA6 and the composites with different MMT loadings.
